# Supplementary material for: Evaluation of the Effects of Fucoidans from Fucus Species and Laminaria hyperborea against Oxidative Stress and Iron-Dependent Cell Death
Source: MDPI journal article supplement (doi:10.3390/md19100557), 2021-09-29
Supplement: s1 [file s1]

Supplemental data

# Evaluation of the Effects of Fucoindans from *Fucus* Species and *Laminaria hyperborea* Against Oxidative Stress and Iron-dependent Cell Death

Philipp Dörschmann <sup>1</sup>, Sarah Apitz <sup>1</sup>, Inga Hellige <sup>2,3</sup>, Sandesh Neupane <sup>4</sup>, Susanne Alban <sup>4</sup>, Georg Kopplin <sup>5</sup>, Signe Ptak <sup>6</sup>, Xavier Fretté <sup>6</sup>, Johann Roider <sup>1</sup>, Marietta Zille <sup>2,3,7,†</sup> and Alexa Klettner <sup>1,\*,†</sup>

<sup>1</sup> Department of Ophthalmology, University of Kiel, University Medical Center, Arnold-Heller-Str. 3, Haus 25, 24105 Kiel, Germany; Philipp.Doerschmann@uksh.de (P.D.); s-apitz@web.de (S.Ap.); Johann.Roider@uksh.de (J.R.); Alexa.Klettner@uksh.de (A.K.)

<sup>2</sup> Fraunhofer Research and Development Center for Marine and Cellular Biotechnology EMB, Mönkhofer Weg 239a, 23562 Lübeck, Germany; inga.hellige@t-online.de (I.H.); m.zille@uni-luebeck.de (M.Z.)

<sup>3</sup> Institute for Medical and Marine Biotechnology, University of Lübeck, Mönkhofer Weg 239a, 23562 Lübeck, Germany;

<sup>4</sup> Pharmaceutical Institute, Kiel University, Gutenbergstraße 76, 24118 Kiel, Germany; sneupane@pharmazie.uni-kiel.de (S.N.); salban@pharmazie.uni-kiel.de (S.Al.)

<sup>5</sup> Alginor ASA, Haraldsgata 162, 5525 Haugesund, Norway, E-mail: Georg@alginor.no

<sup>6</sup> University of Southern Denmark, Campusvej 55, 5230 Odense, Denmark; sihp@igt.sdu.dk (S.P.); xafr@kbm.sdu.dk (X.F.)

<sup>7</sup> Department of Pharmaceutical Sciences, Division of Pharmacology and Toxicology, University of Vienna, UZA II, Althanstraße 14, 1090 Vienna, Austria; marietta.zille@univie.ac.at

\* Correspondence: Alexa.Klettner@uksh.de, Tel: 0049-431-500-24283

† These authors contributed equally to the work.

Table S1. Detailed statistical analyses of erastin and H<sub>2</sub>O<sub>2</sub> concentration-responses.

|                                                       | Kolmogorov-Smirnov test | Levené test                    | Kruskal-Wallis test                                       | Post hoc Mann-Whitney U with Bonferroni-Holm correction                                                                                             |
|-------------------------------------------------------|-------------------------|--------------------------------|-----------------------------------------------------------|-----------------------------------------------------------------------------------------------------------------------------------------------------|
| ARPE-19 cells, erastin 24 hours                       | Z = 0.100,<br>P = 0.200 | F(5,36) = 6.158,<br>P < 0.001  | [chi]2(5,N = 42) = 15.846,<br>P = 0.007, $\eta^2$ = 0.386 | P = 0.633 for 5 $\mu$ M, P = 0.004 for 10 $\mu$ M, P = 0.009 for 15 $\mu$ M, P = 0.004 for 20 $\mu$ M, P = 0.034 for 25 $\mu$ M erastin vs. vehicle |
| ARPE-19 cells, H <sub>2</sub> O <sub>2</sub> 24 hours | Z = 0.148,<br>P = 0.028 | F(4,35) = 11.384,<br>P < 0.001 | [chi]2(4,N = 40) = 20.823,<br>P < 0.001, $\eta^2$ = 0.534 | P = 0.001 for 100 $\mu$ M, P = 0.007 for 250 $\mu$ M, P = 0.001 for 500-1000 $\mu$ M H <sub>2</sub> O <sub>2</sub> vs. vehicle                      |
| OMM-1, erastin 48 hours                               | Z = 0.101,<br>P = 0.200 | F(6,35) = 4.067,<br>P = 0.003  | [chi]2(6,N = 42) = 25.305,<br>P < 0.001, $\eta^2$ = 0.690 | P = 1.000 for 5-20 $\mu$ M, P = 0.012 for 25-30 $\mu$ M erastin vs. vehicle                                                                         |
| OMM-1, H <sub>2</sub> O <sub>2</sub> 48 hours         | Z = 0.128,<br>P = 0.200 | F(4,25) = 10.237,<br>P < 0.001 | [chi]2(4,N = 30) = 26.963,<br>P < 0.001, $\eta^2$ = 0.930 | P = 0.008 for 100-1000 $\mu$ M H <sub>2</sub> O <sub>2</sub> vs. vehicle                                                                            |
| HT-22 cells, erastin 24 hours                         | Z = 0.169,<br>P = 0.001 | F(7,42) = 14.274,<br>P < 0.001 | [chi]2(7,N = 49) = 40.251,<br>P < 0.001, $\eta^2$ = 0.839 | P = 1.000 for 0.1-0.2 $\mu$ M, P = 0.005 for 0.3-1 $\mu$ M erastin vs. vehicle                                                                      |
| SH-SY5Y cells, erastin 24 hours                       | Z = 0.106,<br>P = 0.174 | F(6,49) = 5.270,<br>P < 0.001  | [chi]2(6,N = 56) = 42.423,<br>P < 0.001, $\eta^2$ = 0.771 | P = 0.002 for 5-10 $\mu$ M, P = 0.007 for 15 $\mu$ M, P = 0.002 for 20-30 $\mu$ M erastin vs. vehicle                                               |
| Primary neurons, erastin 24 hours                     | Z = 0.111,<br>P = 0.200 | F(4,20) = 1.953,<br>P = 0.141  | [chi]2(4,N = 25) = 21.522,<br>P < 0.001, $\eta^2$ = 0.897 | P = 0.021 for 0.2-1 $\mu$ M erastin vs. vehicle                                                                                                     |

Table S2. Detailed statistical analyses of ARPE-19 cells exposed to 20  $\mu$ M erastin and fucoidan for 24 hours.

|     | Kolmogorov-Smirnov test | Levené test                  | Kruskal-Wallis test                                        | Post hoc Mann-Whitney U with Bonferroni-Holm correction                                                                                                          |
|-----|-------------------------|------------------------------|------------------------------------------------------------|------------------------------------------------------------------------------------------------------------------------------------------------------------------|
| FVs | $Z = 0.132, P = 0.007$  | $F(9,55) = 3.177, P = 0.004$ | $[\chi^2]2(9, N = 65) = 46.782, P < 0.001, \eta^2 = 0.731$ | 20 $\mu$ M erastin vs. control: $P = 0.008$<br>20 $\mu$ M erastin + fucoidan vs. 20 $\mu$ M erastin:<br>1-50 $\mu$ g/ml, $P = 1.000$                             |
| FVm | $Z = 0.111, P = 0.045$  | $F(9,55) = 1.705, P = 0.110$ | $[\chi^2]2(9, N = 65) = 45.719, P < 0.001, \eta^2 = 0.714$ | 20 $\mu$ M erastin vs. control: $P = 0.008$<br>20 $\mu$ M erastin + fucoidan vs. 20 $\mu$ M erastin:<br>1-50 $\mu$ g/ml, $P = 1.000$                             |
| UPm | $Z = 0.112, P = 0.041$  | $F(9,55) = 3.661, P = 0.001$ | $[\chi^2]2(9, N = 65) = 40.794, P < 0.001, \eta^2 = 0.637$ | 20 $\mu$ M erastin vs. control: $P = 0.008$<br>20 $\mu$ M erastin + fucoidan vs. 20 $\mu$ M erastin:<br>1 $\mu$ g/ml: $P = 0.567$ , 5-50 $\mu$ g/ml: $P = 1.000$ |
| FV1 | $Z = 0.181, P < 0.001$  | $F(9,55) = 3.322, P = 0.003$ | $[\chi^2]2(9, N = 65) = 35.555, P < 0.001, \eta^2 = 0.556$ | 20 $\mu$ M erastin vs. control: $P = 0.008$<br>20 $\mu$ M erastin + fucoidan vs. 20 $\mu$ M erastin:<br>1-50 $\mu$ g/ml, $P = 1.000$                             |
| FV2 | $Z = 0.122, P = 0.017$  | $F(9,55) = 3.492, P = 0.002$ | $[\chi^2]2(9, N = 65) = 37.982, P < 0.001, \eta^2 = 0.593$ | 20 $\mu$ M erastin vs. control: $P = 0.008$<br>20 $\mu$ M erastin + fucoidan vs. 20 $\mu$ M erastin:<br>1-50 $\mu$ g/ml, $P = 0.899$                             |
| FV3 | $Z = 0.213, P < 0.001$  | $F(9,55) = 3.374, P = 0.002$ | $[\chi^2]2(9, N = 65) = 38.937, P < 0.001, \eta^2 = 0.608$ | 20 $\mu$ M erastin vs. control: $P = 0.008$<br>20 $\mu$ M erastin + fucoidan vs. 20 $\mu$ M erastin:<br>1 $\mu$ g/ml: $P = 0.567$ , 5-50 $\mu$ g/ml: $P = 1.000$ |
| FS  | $Z = 0.105, P = 0.099$  | $F(9,50) = 2.981,$           | $[\chi^2]2(9, N = 60) = 36.363, P < 0.001,$                | 20 $\mu$ M erastin vs. control: $P = 0.008$                                                                                                                      |

|      |                        |                                    |                                                                       |                                                                                                                                                                                                                                                                          |
|------|------------------------|------------------------------------|-----------------------------------------------------------------------|--------------------------------------------------------------------------------------------------------------------------------------------------------------------------------------------------------------------------------------------------------------------------|
|      |                        | $P = 0.006$                        | $\eta^2 = 0.616$                                                      | 20 $\mu\text{M}$ erastin + fucoidan vs. 20 $\mu\text{M}$ erastin:<br>1 $\mu\text{g/ml}$ : $P = 0.109$ , 5 $\mu\text{g/ml}$ : $P = 0.049$ , 10 $\mu\text{g/ml}$ : $P = 0.075$ ,<br>50 $\mu\text{g/ml}$ : $P = 0.016$                                                      |
| FE   | $Z = 0.101, P = 0.200$ | $F(9,50) = 6.172$ ,<br>$P < 0.001$ | $[\text{chi}]^2(9, N = 60) = 47.236, P < 0.001$ ,<br>$\eta^2 = 0.801$ | 20 $\mu\text{M}$ erastin vs. control: $P = 0.008$<br>20 $\mu\text{M}$ erastin + fucoidan vs. 20 $\mu\text{M}$ erastin:<br>1 $\mu\text{g/ml}$ : $P = 0.423$ , 5 $\mu\text{g/ml}$ : $P = 0.109$ , 10 $\mu\text{g/ml}$ : $P = 0.075$ ,<br>50 $\mu\text{g/ml}$ : $P = 0.026$ |
| Fuc1 | $Z = 0.114, P = 0.050$ | $F(9,50) = 2.461$ ,<br>$P = 0.021$ | $[\text{chi}]^2(9, N = 60) = 47.516, P < 0.001$ ,<br>$\eta^2 = 0.805$ | 20 $\mu\text{M}$ erastin vs. control: $P = 0.008$<br>20 $\mu\text{M}$ erastin + fucoidan vs. 20 $\mu\text{M}$ erastin:<br>1-5 $\mu\text{g/ml}$ : $P = 0.400$ , 10 $\mu\text{g/ml}$ : $P = 0.100$ , 50 $\mu\text{g/ml}$ : $P = 0.164$                                     |

Table S3. Detailed statistical analyses of ARPE-19 cells exposed to 500  $\mu\text{M}$   $\text{H}_2\text{O}_2$  and fucoidan for 24 hours.

|     | Kolmogorov-Smirnov test | Levené test                  | Kruskal-Wallis test                                        | Post hoc Mann-Whitney U with Bonferroni-Holm correction                                                                                                                                                                                                                                                                   |
|-----|-------------------------|------------------------------|------------------------------------------------------------|---------------------------------------------------------------------------------------------------------------------------------------------------------------------------------------------------------------------------------------------------------------------------------------------------------------------------|
| FVs | $Z = 0.199, P < 0.001$  | $F(9,50) = 3.572, P = 0.002$ | $[\chi^2]2(9, N = 60) = 45.165, P < 0.001, \eta^2 = 0.766$ | 500 $\mu\text{M}$ $\text{H}_2\text{O}_2$ vs. control: $P = 0.010$<br>500 $\mu\text{M}$ $\text{H}_2\text{O}_2$ + fucoidan vs. 500 $\mu\text{M}$ $\text{H}_2\text{O}_2$ :<br>1-50 $\mu\text{g/ml}$ : $P = 1.000$                                                                                                            |
| FVm | $Z = 0.216, P < 0.001$  | $F(9,50) = 2.561, P = 0.017$ | $[\chi^2]2(9, N = 60) = 47.020, P < 0.001, \eta^2 = 0.797$ | 500 $\mu\text{M}$ $\text{H}_2\text{O}_2$ vs. control: $P = 0.010$<br>500 $\mu\text{M}$ $\text{H}_2\text{O}_2$ + fucoidan vs. 500 $\mu\text{M}$ $\text{H}_2\text{O}_2$ :<br>1 $\mu\text{g/ml}$ : $P = 1.000$ , 5 $\mu\text{g/ml}$ : $P = 0.313$ , 10 $\mu\text{g/ml}$ : $P = 0.449$ , 50 $\mu\text{g/ml}$ :<br>$P = 1.000$ |
| UPm | $Z = 0.154, P < 0.001$  | $F(9,50) = 4.056, P = 0.001$ | $[\chi^2]2(9, N = 60) = 46.497, P < 0.001, \eta^2 = 0.788$ | 500 $\mu\text{M}$ $\text{H}_2\text{O}_2$ vs. control: $P = 0.010$<br>500 $\mu\text{M}$ $\text{H}_2\text{O}_2$ + fucoidan vs. 500 $\mu\text{M}$ $\text{H}_2\text{O}_2$ :<br>1 $\mu\text{g/ml}$ : $P = 1.000$ , 5 $\mu\text{g/ml}$ : $P = 0.313$ , 10-50 $\mu\text{g/ml}$ : $P = 1.000$                                     |
| FV1 | $Z = 0.201, P < 0.001$  | $F(9,50) = 2.908, P = 0.008$ | $[\chi^2]2(9, N = 60) = 43.350, P < 0.001, \eta^2 = 0.735$ | 500 $\mu\text{M}$ $\text{H}_2\text{O}_2$ vs. control: $P = 0.010$<br>500 $\mu\text{M}$ $\text{H}_2\text{O}_2$ + fucoidan vs. 500 $\mu\text{M}$ $\text{H}_2\text{O}_2$ :<br>1 $\mu\text{g/ml}$ : $P = 0.749$ , 5 $\mu\text{g/ml}$ : $P = 0.345$ , 10 $\mu\text{g/ml}$ : $P = 0.164$ , 50 $\mu\text{g/ml}$ :<br>$P = 0.100$ |
| FV2 | $Z = 0.145, P = 0.003$  | $F(9,50) = 3.134, P = 0.005$ | $[\chi^2]2(9, N = 60) = 45.944, P < 0.001, \eta^2 = 0.779$ | 500 $\mu\text{M}$ $\text{H}_2\text{O}_2$ vs. control: $P = 0.010$<br>500 $\mu\text{M}$ $\text{H}_2\text{O}_2$ + fucoidan vs. 500 $\mu\text{M}$ $\text{H}_2\text{O}_2$ :<br>1-50 $\mu\text{g/ml}$ : $P = 1.000$                                                                                                            |
| FV3 | $Z = 0.198, P < 0.001$  | $F(9,50) = 2.425, P = 0.023$ | $[\chi^2]2(9, N = 60) = 44.866, P < 0.001, \eta^2 = 0.760$ | 500 $\mu\text{M}$ $\text{H}_2\text{O}_2$ vs. control: $P = 0.010$<br>500 $\mu\text{M}$ $\text{H}_2\text{O}_2$ + fucoidan vs. 500 $\mu\text{M}$ $\text{H}_2\text{O}_2$ :                                                                                                                                                   |

|      |                        |                                   |                                                                 |                                                                                                                                                                                                                                       |
|------|------------------------|-----------------------------------|-----------------------------------------------------------------|---------------------------------------------------------------------------------------------------------------------------------------------------------------------------------------------------------------------------------------|
|      |                        |                                   |                                                                 | 1-50 µg/ml: $P = 1.000$                                                                                                                                                                                                               |
| FS   | $Z = 0.163, P < 0.001$ | $F(9,50) = 3.219,$<br>$P = 0.004$ | $[\chi^2]2(9, N = 60) = 45.096, P < 0.001,$<br>$\eta^2 = 0.764$ | 500 µM H <sub>2</sub> O <sub>2</sub> vs. control: $P = 0.010$<br>500 µM H <sub>2</sub> O <sub>2</sub> + fucoidan vs. 500 µM H <sub>2</sub> O <sub>2</sub> :<br>1 µg/ml: $P = 0.601$ , 5 µg/ml: $P = 0.598$ , 10-50 µg/ml: $P = 1.000$ |
| FE   | $Z = 0.085, P = 0.200$ | $F(9,50) = 4.539,$<br>$P < 0.001$ | $[\chi^2]2(9, N = 60) = 47.391, P < 0.001,$<br>$\eta^2 = 0.803$ | 500 µM H <sub>2</sub> O <sub>2</sub> vs. control: $P = 0.010$<br>500 µM H <sub>2</sub> O <sub>2</sub> + fucoidan vs. 500 µM H <sub>2</sub> O <sub>2</sub> :<br>1-10 µg/ml: $P = 1.000$ , 50 µg/ml: $P = 0.065$                        |
| Fuc1 | $Z = 0.139, P = 0.005$ | $F(9,50) = 2.693,$<br>$P = 0.012$ | $[\chi^2]2(9, N = 60) = 47.522, P < 0.001,$<br>$\eta^2 = 0.805$ | 500 µM H <sub>2</sub> O <sub>2</sub> vs. control: $P = 0.010$<br>500 µM H <sub>2</sub> O <sub>2</sub> + fucoidan vs. 500 µM H <sub>2</sub> O <sub>2</sub> :<br>1-5 µg/ml: $P = 0.328$ , 10 µg/ml: $P = 0.337$ , 50 µg/ml: $P = 0.219$ |

Table S4. Detailed statistical analyses of OMM-1 cells exposed to 25  $\mu$ M erastin and fucoidan for 48 hours.

|     | Kolmogorov-Smirnov test | Levené test                  | Kruskal-Wallis test                                        | Post hoc Mann-Whitney U with Bonferroni-Holm correction                                                                                                                                                                 |
|-----|-------------------------|------------------------------|------------------------------------------------------------|-------------------------------------------------------------------------------------------------------------------------------------------------------------------------------------------------------------------------|
| FVs | $Z = 0.131, P = 0.005$  | $F(9,60) = 4.144, P < 0.001$ | $[\chi^2]2(9, N = 70) = 54.176, P < 0.001, \eta^2 = 0.785$ | 25 $\mu$ M erastin vs. control: $P = 0.004$<br>25 $\mu$ M erastin + fucoidan vs. 25 $\mu$ M erastin:<br>1 $\mu$ g/ml: $P = 0.072$ , 5 $\mu$ g/ml: $P = 0.105$ , 10 $\mu$ g/ml: $P = 0.225$ , 50 $\mu$ g/ml: $P = 0.128$ |
| FVm | $Z = 0.183, P < 0.001$  | $F(9,50) = 5.551, P < 0.001$ | $[\chi^2]2(9, N = 60) = 49.615, P < 0.001, \eta^2 = 0.841$ | 25 $\mu$ M erastin vs. control: $P = 0.010$<br>25 $\mu$ M erastin + fucoidan vs. 25 $\mu$ M erastin:<br>1-5 $\mu$ g/ml: $P = 0.065$ , 10 $\mu$ g/ml: $P = 0.525$ , 50 $\mu$ g/ml: $P = 0.749$                           |
| UPm | $Z = 0.190, P < 0.001$  | $F(9,60) = 3.473, P = 0.002$ | $[\chi^2]2(9, N = 70) = 53.145, P < 0.001, \eta^2 = 0.770$ | 25 $\mu$ M erastin vs. control: $P = 0.004$<br>25 $\mu$ M erastin + fucoidan vs. 25 $\mu$ M erastin:<br>1-10 $\mu$ g/ml: $P = 1.000$ , 50 $\mu$ g/ml: $P = 0.072$                                                       |
| FV1 | $Z = 0.197, P < 0.001$  | $F(9,80) = 3.723, P < 0.001$ | $[\chi^2]2(9, N = 90) = 69.130, P < 0.001, \eta^2 = 0.777$ | 25 $\mu$ M erastin vs. control: $P < 0.001$<br>25 $\mu$ M erastin + fucoidan vs. 25 $\mu$ M erastin:<br>1 $\mu$ g/ml: $P = 0.825$ , 5 $\mu$ g/ml: $P = 0.648$ , 10 $\mu$ g/ml: $P = 0.340$ , 50 $\mu$ g/ml: $P = 0.648$ |
| FV2 | $Z = 0.229, P < 0.001$  | $F(9,70) = 3.881, P < 0.001$ | $[\chi^2]2(9, N = 80) = 63.329, P < 0.001, \eta^2 = 0.802$ | 25 $\mu$ M erastin vs. control: $P = 0.002$<br>25 $\mu$ M erastin + fucoidan vs. 25 $\mu$ M erastin:<br>1-10 $\mu$ g/ml: $P = 0.345$ , 50 $\mu$ g/ml: $P = 0.063$                                                       |
| FV3 | $Z = 0.197, P < 0.001$  | $F(9,70) = 7.136, P < 0.001$ | $[\chi^2]2(9, N = 80) = 62.196, P < 0.001, \eta^2 = 0.787$ | 25 $\mu$ M erastin vs. control: $P = 0.002$<br>25 $\mu$ M erastin + fucoidan vs. 25 $\mu$ M erastin:                                                                                                                    |

|      |                        |                                   |                                                                 |                                                                                                                                                                                         |
|------|------------------------|-----------------------------------|-----------------------------------------------------------------|-----------------------------------------------------------------------------------------------------------------------------------------------------------------------------------------|
|      |                        |                                   |                                                                 | 1-50 µg/ml: $P = 0.992$                                                                                                                                                                 |
| FS   | $Z = 0.173, P < 0.001$ | $F(9,60) = 2.994,$<br>$P = 0.005$ | $[\chi^2_2(9, N = 70) = 58.165, P < 0.001,$<br>$\eta^2 = 0.868$ | 25 µM erastin vs. control: $P = 0.004$<br>25 µM erastin + fucoidan vs. 25 µM erastin:<br>1 µg/ml: $P = 0.812$ , 5 µg/ml: $P = 0.478$ , 10 µg/ml: $P = 0.812$ , 50 µg/ml,<br>$P = 0.101$ |
| FE   | $Z = 0.194, P < 0.001$ | $F(9,50) = 3.602,$<br>$P = 0.002$ | $[\chi^2_2(9, N = 60) = 52.338, P < 0.001,$<br>$\eta^2 = 0.887$ | 25 µM erastin vs. control: $P = 0.010$<br>25 µM erastin + fucoidan vs. 25 µM erastin:<br>1 µg/ml: $P = 0.109$ , 5 µg/ml: $P = 0.019$ , 10 µg/ml: $P = 0.021$ , 50 µg/ml,<br>$P = 0.016$ |
| Fuc1 | $Z = 0.149, P = 0.002$ | $F(9,50) = 4.641,$<br>$P < 0.001$ | $[\chi^2_2(9, N = 60) = 47.508, P < 0.001,$<br>$\eta^2 = 0.805$ | 25 µM erastin vs. control: $P = 0.010$<br>25 µM erastin + fucoidan vs. 25 µM erastin:<br>1 µg/ml: $P = 0.337$ , 5 µg/ml: $P = 0.112$ , 10 µg/ml: $P = 0.026$ , 50 µg/ml,<br>$P = 0.112$ |



Table S5. Detailed statistical analyses of OMM-1 cells exposed to 250  $\mu\text{M}$   $\text{H}_2\text{O}_2$  and fucoidan for 48 hours.

|     | Kolmogorov-Smirnov test | Levené test                  | Kruskal-Wallis test                                            | Post hoc Mann-Whitney U with Bonferroni correction at $\alpha = 0.01$                                                                                                                                                                                                                                                     |
|-----|-------------------------|------------------------------|----------------------------------------------------------------|---------------------------------------------------------------------------------------------------------------------------------------------------------------------------------------------------------------------------------------------------------------------------------------------------------------------------|
| FVs | $Z = 0.172, P < 0.001$  | $F(9,60) = 2.931, P = 0.006$ | $[\text{chi}]2(9, N = 70) = 53.978, P < 0.001, \eta^2 = 0.782$ | 250 $\mu\text{M}$ $\text{H}_2\text{O}_2$ vs. control: $P = 0.004$<br>250 $\mu\text{M}$ $\text{H}_2\text{O}_2$ + fucoidan vs. 250 $\mu\text{M}$ $\text{H}_2\text{O}_2$ :<br>1 $\mu\text{g/ml}$ : $P = 0.035$ , 5-50 $\mu\text{g/ml}$ : $P = 0.539$                                                                         |
| FVm | $Z = 0.172, P < 0.001$  | $F(9,50) = 4.671, P < 0.001$ | $[\text{chi}]2(9, N = 60) = 43.561, P < 0.001, \eta^2 = 0.738$ | 250 $\mu\text{M}$ $\text{H}_2\text{O}_2$ vs. control: $P = 0.010$<br>250 $\mu\text{M}$ $\text{H}_2\text{O}_2$ + fucoidan vs. 250 $\mu\text{M}$ $\text{H}_2\text{O}_2$ :<br>1-50 $\mu\text{g/ml}$ : $P = 1.000$                                                                                                            |
| UPm | $Z = 0.231, P < 0.001$  | $F(9,60) = 2.652, P = 0.012$ | $[\text{chi}]2(9, N = 70) = 54.380, P < 0.001, \eta^2 = 0.788$ | 250 $\mu\text{M}$ $\text{H}_2\text{O}_2$ vs. control: $P = 0.004$<br>250 $\mu\text{M}$ $\text{H}_2\text{O}_2$ + fucoidan vs. 250 $\mu\text{M}$ $\text{H}_2\text{O}_2$ :<br>1 $\mu\text{g/ml}$ : $P = 0.283$ , 5 $\mu\text{g/ml}$ : $P = 0.051$ , 10 $\mu\text{g/ml}$ : $P = 0.749$ , 50 $\mu\text{g/ml}$ ,<br>$P = 0.191$ |
| FV1 | $Z = 0.218, P < 0.001$  | $F(9,80) = 8.801, P < 0.001$ | $[\text{chi}]2(9, N = 90) = 67.971, P < 0.001, \eta^2 = 0.764$ | 250 $\mu\text{M}$ $\text{H}_2\text{O}_2$ vs. control: $P < 0.001$<br>250 $\mu\text{M}$ $\text{H}_2\text{O}_2$ + fucoidan vs. 250 $\mu\text{M}$ $\text{H}_2\text{O}_2$ :<br>1-50 $\mu\text{g/ml}$ : $P = 1.000$                                                                                                            |
| FV2 | $Z = 0.211, P < 0.001$  | $F(9,70) = 3.359, P = 0.002$ | $[\text{chi}]2(9, N = 80) = 62.416, P < 0.001, \eta^2 = 0.790$ | 250 $\mu\text{M}$ $\text{H}_2\text{O}_2$ vs. control: $P = 0.002$<br>250 $\mu\text{M}$ $\text{H}_2\text{O}_2$ + fucoidan vs. 250 $\mu\text{M}$ $\text{H}_2\text{O}_2$ :<br>1-50 $\mu\text{g/ml}$ : $P = 0.992$                                                                                                            |
| FV3 | $Z = 0.229, P < 0.001$  | $F(9,70) = 2.354, P = 0.022$ | $[\text{chi}]2(9, N = 80) = 61.882, P < 0.001, \eta^2 = 0.783$ | 250 $\mu\text{M}$ $\text{H}_2\text{O}_2$ vs. control: $P = 0.002$<br>250 $\mu\text{M}$ $\text{H}_2\text{O}_2$ + fucoidan vs. 250 $\mu\text{M}$ $\text{H}_2\text{O}_2$ :<br>1-50 $\mu\text{g/ml}$ : $P = 1.000$                                                                                                            |

|      |                        |                                   |                                                                  |                                                                                                                                                                                                                                                                                       |
|------|------------------------|-----------------------------------|------------------------------------------------------------------|---------------------------------------------------------------------------------------------------------------------------------------------------------------------------------------------------------------------------------------------------------------------------------------|
| FS   | $Z = 0.226, P < 0.001$ | $F(9,60) = 2.072,$<br>$P = 0.046$ | $[\chi^2]_2(9, N = 70) = 57.434, P < 0.001,$<br>$\eta^2 = 0.832$ | 250 $\mu\text{M}$ $\text{H}_2\text{O}_2$ vs. control: $P = 0.004$<br>250 $\mu\text{M}$ $\text{H}_2\text{O}_2$ + fucoidan vs. 250 $\mu\text{M}$ $\text{H}_2\text{O}_2$ :<br>1-50 $\mu\text{g/ml}$ : $P = 1.000$                                                                        |
| FE   | $Z = 0.232, P < 0.001$ | $F(9,50) = 3.764,$<br>$P = 0.001$ | $[\chi^2]_2(9, N = 60) = 49.196, P < 0.001,$<br>$\eta^2 = 0.834$ | 250 $\mu\text{M}$ $\text{H}_2\text{O}_2$ vs. control: $P = 0.010$<br>250 $\mu\text{M}$ $\text{H}_2\text{O}_2$ + fucoidan vs. 250 $\mu\text{M}$ $\text{H}_2\text{O}_2$ :<br>1-5 $\mu\text{g/ml}$ : $P = 1.000$ , 10 $\mu\text{g/ml}$ : $P = 0.801$ , 50 $\mu\text{g/ml}$ : $P = 1.000$ |
| Fuc1 | $Z = 0.190, P < 0.001$ | $F(9,50) = 5.600,$<br>$P < 0.001$ | $[\chi^2]_2(9, N = 60) = 45.491, P < 0.001,$<br>$\eta^2 = 0.771$ | 250 $\mu\text{M}$ $\text{H}_2\text{O}_2$ vs. control: $P = 0.010$<br>250 $\mu\text{M}$ $\text{H}_2\text{O}_2$ + fucoidan vs. 250 $\mu\text{M}$ $\text{H}_2\text{O}_2$ :<br>1-50 $\mu\text{g/ml}$ : $P = 1.000$                                                                        |

Table S6. Detailed statistical analyses of HT-22 cells exposed to 0.35  $\mu$ M erastin and fucoidan for 24 hours.

|     | Kolmogorov-Smirnov test | Levené test                  | Kruskal-Wallis test                                        | Post hoc Mann-Whitney U with Bonferroni-Holm correction                                                                                                                                                                       |
|-----|-------------------------|------------------------------|------------------------------------------------------------|-------------------------------------------------------------------------------------------------------------------------------------------------------------------------------------------------------------------------------|
| FVs | $Z = 0.205, P < 0.001$  | $F(9,50) = 4.001, P = 0.001$ | $[\chi^2]2(9, N = 60) = 49.291, P < 0.001, \eta^2 = 0.835$ | 0.35 $\mu$ M erastin vs. control: $P = 0.010$<br>0.35 $\mu$ M erastin + fucoidan vs. 0.35 $\mu$ M erastin:<br>1-10 $\mu$ g/ml: $P = 0.016$ , 50 $\mu$ g/ml: $P = 0.200$                                                       |
| FVm | $Z = 0.201, P < 0.001$  | $F(9,50) = 4.320, P < 0.001$ | $[\chi^2]2(9, N = 60) = 44.747, P < 0.001, \eta^2 = 0.809$ | 0.35 $\mu$ M erastin vs. control: $P = 0.010$<br>0.35 $\mu$ M erastin + fucoidan vs. 0.35 $\mu$ M erastin:<br>1-50 $\mu$ g/ml: $P = 1.000$                                                                                    |
| UPm | $Z = 0.246, P < 0.001$  | $F(9,50) = 6.034, P < 0.001$ | $[\chi^2]2(9, N = 60) = 46.279, P < 0.001, \eta^2 = 0.784$ | 0.35 $\mu$ M erastin vs. control: $P = 0.010$<br>0.35 $\mu$ M erastin + fucoidan vs. 0.35 $\mu$ M erastin:<br>1-50 $\mu$ g/ml: $P = 1.000$                                                                                    |
| FV1 | $Z = 0.213, P < 0.001$  | $F(9,50) = 4.994, P < 0.001$ | $[\chi^2]2(9, N = 60) = 49.314, P < 0.001, \eta^2 = 0.836$ | 0.35 $\mu$ M erastin vs. control: $P = 0.010$<br>0.35 $\mu$ M erastin + fucoidan vs. 0.35 $\mu$ M erastin:<br>1 $\mu$ g/ml: $P = 0.525$ , 5 $\mu$ g/ml: $P = 0.149$ , 10 $\mu$ g/ml: $P = 0.749$ , 50 $\mu$ g/ml: $P = 0.149$ |
| FV2 | $Z = 0.200, P < 0.001$  | $F(9,50) = 3.196, P = 0.004$ | $[\chi^2]2(9, N = 60) = 44.811, P < 0.001, \eta^2 = 0.760$ | 0.35 $\mu$ M erastin vs. control: $P = 0.010$<br>0.35 $\mu$ M erastin + fucoidan vs. 0.35 $\mu$ M erastin:<br>1-50 $\mu$ g/ml: $P = 1.000$                                                                                    |
| FV3 | $Z = 0.195, P < 0.001$  | $F(9,50) = 1.789, P = 0.094$ | $[\chi^2]2(9, N = 60) = 45.782, P < 0.001, \eta^2 = 0.776$ | 0.35 $\mu$ M erastin vs. control: $P = 0.010$<br>0.35 $\mu$ M erastin + fucoidan vs. 0.35 $\mu$ M erastin:<br>1-50 $\mu$ g/ml: $P = 1.000$                                                                                    |

|               |                        |                                   |                                                                 |                                                                                                                                                                     |
|---------------|------------------------|-----------------------------------|-----------------------------------------------------------------|---------------------------------------------------------------------------------------------------------------------------------------------------------------------|
| FS            | $Z = 0.179, P < 0.001$ | $F(9,50) = 2.917,$<br>$P = 0.007$ | $[\chi^2_2(9, N = 60) = 44.854, P < 0.001,$<br>$\eta^2 = 0.760$ | 0.35 $\mu\text{M}$ erastin vs. control: $P = 0.010$<br>0.35 $\mu\text{M}$ erastin + fucoidan vs. 0.35 $\mu\text{M}$ erastin:<br>1-50 $\mu\text{g/ml}$ : $P = 1.000$ |
| FE            | $Z = 0.172, P < 0.001$ | $F(9,50) = 2.393,$<br>$P = 0.024$ | $[\chi^2_2(9, N = 60) = 45.571, P < 0.001,$<br>$\eta^2 = 0.772$ | 0.35 $\mu\text{M}$ erastin vs. control: $P = 0.010$<br>0.35 $\mu\text{M}$ erastin + fucoidan vs. 0.35 $\mu\text{M}$ erastin:<br>1-50 $\mu\text{g/ml}$ : $P = 1.000$ |
| Fuc1          | $Z = 0.178, P < 0.001$ | $F(9,50) = 2.537,$<br>$P = 0.018$ | $[\chi^2_2(9, N = 60) = 46.860, P < 0.001,$<br>$\eta^2 = 0.794$ | 0.35 $\mu\text{M}$ erastin vs. control: $P = 0.010$<br>0.35 $\mu\text{M}$ erastin + fucoidan vs. 0.35 $\mu\text{M}$ erastin:<br>1-50 $\mu\text{g/ml}$ : $P = 1.000$ |
| Ferrostatin-1 | $Z = 0.310, P < 0.001$ | $F(3,16) = 7.654,$<br>$P = 0.002$ | $[\chi^2_2(3, N = 20) = 15.275, P = 0.002,$<br>$\eta^2 = 0.804$ | 0.35 $\mu\text{M}$ erastin vs. control: $P = 0.011$<br>0.35 $\mu\text{M}$ erastin + ferrostatin-1 vs. 0.35 $\mu\text{M}$ erastin: $P = 0.011$                       |

Table S7. Detailed statistical analyses of SH-SY5Y cells exposed to 30  $\mu$ M erastin and fucoidan for 24 hours.

|     | Kolmogorov-Smirnov test | Levené test                  | Kruskal-Wallis test                                        | Post hoc Mann-Whitney U with Bonferroni-Holm correction                                                                                                                                       |
|-----|-------------------------|------------------------------|------------------------------------------------------------|-----------------------------------------------------------------------------------------------------------------------------------------------------------------------------------------------|
| FVs | $Z = 0.260, P < 0.001$  | $F(9,50) = 1.818, P = 0.088$ | $[\chi^2]2(9, N = 60) = 47.225, P < 0.001, \eta^2 = 0.800$ | 30 $\mu$ M erastin vs. control: $P = 0.010$<br>30 $\mu$ M erastin + fucoidan vs. 30 $\mu$ M erastin:<br>1-5 $\mu$ g/ml: $P = 0.313$ , 10 $\mu$ g/ml: $P = 0.631$ , 50 $\mu$ g/ml: $P = 0.458$ |
| FVm | $Z = 0.180, P < 0.001$  | $F(9,50) = 2.680, P = 0.013$ | $[\chi^2]2(9, N = 60) = 48.297, P < 0.001, \eta^2 = 0.819$ | 30 $\mu$ M erastin vs. control: $P = 0.010$<br>30 $\mu$ M erastin + fucoidan vs. 30 $\mu$ M erastin:<br>1-50 $\mu$ g/ml: $P = 0.598$                                                          |
| UPm | $Z = 0.216, P < 0.001$  | $F(9,50) = 7.232, P < 0.001$ | $[\chi^2]2(9, N = 60) = 48.985, P < 0.001, \eta^2 = 0.830$ | 30 $\mu$ M erastin vs. control: $P = 0.010$<br>30 $\mu$ M erastin + fucoidan vs. 30 $\mu$ M erastin:<br>1 $\mu$ g/ml: $P = 0.601$ , 5-10 $\mu$ g/ml: $P = 0.673$ , 50 $\mu$ g/ml: $P = 0.313$ |
| FV1 | $Z = 0.255, P < 0.001$  | $F(9,50) = 2.505, P = 0.019$ | $[\chi^2]2(9, N = 60) = 47.787, P < 0.001, \eta^2 = 0.810$ | 30 $\mu$ M erastin vs. control: $P = 0.010$<br>30 $\mu$ M erastin + fucoidan vs. 30 $\mu$ M erastin:<br>1 $\mu$ g/ml: $P = 0.078$ , 5-10 $\mu$ g/ml: $P = 0.075$ , 50 $\mu$ g/ml: $P = 0.065$ |
| FV2 | $Z = 0.208, P < 0.001$  | $F(9,50) = 4.117, P = 0.001$ | $[\chi^2]2(9, N = 60) = 45.144, P < 0.001, \eta^2 = 0.765$ | 30 $\mu$ M erastin vs. control: $P = 0.010$<br>30 $\mu$ M erastin + fucoidan vs. 30 $\mu$ M erastin:<br>1-50 $\mu$ g/ml: $P = 1.000$                                                          |
| FV3 | $Z = 0.237, P < 0.001$  | $F(9,50) = 2.059, P = 0.052$ | $[\chi^2]2(9, N = 60) = 45.781, P < 0.001, \eta^2 = 0.776$ | 30 $\mu$ M erastin vs. control: $P = 0.010$<br>30 $\mu$ M erastin + fucoidan vs. 30 $\mu$ M erastin:<br>1-50 $\mu$ g/ml: $P = 1.000$                                                          |
| FS  | $Z = 0.224, P < 0.001$  | $F(9,50) = 3.730, P = 0.001$ | $[\chi^2]2(9, N = 60) = 46.224, P < 0.001, \eta^2 = 0.776$ | 30 $\mu$ M erastin vs. control: $P = 0.010$                                                                                                                                                   |

|               |                        |                                   |                                                                     |                                                                                                                                                                                                   |
|---------------|------------------------|-----------------------------------|---------------------------------------------------------------------|---------------------------------------------------------------------------------------------------------------------------------------------------------------------------------------------------|
|               |                        | $P = 0.001$                       | $\eta^2 = 0.783$                                                    | 30 $\mu\text{M}$ erastin + fucoidan vs. 30 $\mu\text{M}$ erastin:<br>1-50 $\mu\text{g/ml}$ : $P = 1.000$                                                                                          |
| FE            | $Z = 0.201, P < 0.001$ | $F(9,50) = 3.075,$<br>$P = 0.005$ | $[\text{chi}]2(9, N = 60) = 47.749, P < 0.001,$<br>$\eta^2 = 0.809$ | 30 $\mu\text{M}$ erastin vs. control: $P = 0.010$<br>30 $\mu\text{M}$ erastin + fucoidan vs. 30 $\mu\text{M}$ erastin:<br>1-50 $\mu\text{g/ml}$ : $P = 1.000$                                     |
| Fuc1          | $Z = 0.210, P < 0.001$ | $F(9,50) = 3.218,$<br>$P = 0.004$ | $[\text{chi}]2(9, N = 60) = 48.272, P < 0.001,$<br>$\eta^2 = 0.818$ | 30 $\mu\text{M}$ erastin vs. control: $P = 0.010$<br>30 $\mu\text{M}$ erastin + fucoidan vs. 30 $\mu\text{M}$ erastin:<br>1-10 $\mu\text{g/ml}$ : $P = 1.000$ , 50 $\mu\text{g/ml}$ : $P = 0.801$ |
| Ferrostatin-1 | $Z = 0.257, P = 0.001$ | $F(3,16) = 3.492,$<br>$P = 0.040$ | $[\text{chi}]2(3, N = 20) = 16.459, P = 0.001,$<br>$\eta^2 = 0.866$ | 30 $\mu\text{M}$ erastin vs. control: $P = 0.011$<br>30 $\mu\text{M}$ erastin + ferrostatin-1 vs. 30 $\mu\text{M}$ erastin: $P = 0.465$                                                           |

Table S8. Detailed statistical analyses of primary cortical neurons exposed to 0.5  $\mu$ M erastin and fucoidan for 24 hours.

|     | Kolmogorov-Smirnov test | Levené test                  | Kruskal-Wallis test                                        | Post hoc Mann-Whitney U with Bonferroni-Holm correction                                                                                                                                            |
|-----|-------------------------|------------------------------|------------------------------------------------------------|----------------------------------------------------------------------------------------------------------------------------------------------------------------------------------------------------|
| FVs | $Z = 0.211, P < 0.001$  | $F(9,50) = 2.161, P = 0.041$ | $[\chi^2]2(9, N = 60) = 45.233, P < 0.001, \eta^2 = 0.767$ | 0.5 $\mu$ M erastin vs. control: $P = 0.010$<br>0.5 $\mu$ M erastin + fucoidan vs. 0.5 $\mu$ M erastin:<br>0.1-5 $\mu$ g/ml: $P = 0.437$                                                           |
| FVm | $Z = 0.210, P < 0.001$  | $F(9,50) = 2.628, P = 0.014$ | $[\chi^2]2(9, N = 60) = 46.032, P < 0.001, \eta^2 = 0.780$ | 0.5 $\mu$ M erastin vs. control: $P = 0.010$<br>0.5 $\mu$ M erastin + fucoidan vs. 0.5 $\mu$ M erastin:<br>0.1-5 $\mu$ g/ml: $P = 1.000$                                                           |
| UPm | $Z = 0.211, P < 0.001$  | $F(9,50) = 3.081, P = 0.005$ | $[\chi^2]2(9, N = 60) = 46.690, P < 0.001, \eta^2 = 0.791$ | 0.5 $\mu$ M erastin vs. control: $P = 0.010$<br>0.5 $\mu$ M erastin + fucoidan vs. 0.5 $\mu$ M erastin:<br>0.1 $\mu$ g/ml: $P = 0.749$ , 0.5-1 $\mu$ g/ml: $P = 0.449$ , 5 $\mu$ g/ml: $P = 0.313$ |
| FV1 | $Z = 0.147, P = 0.003$  | $F(9,50) = 2.167, P = 0.041$ | $[\chi^2]2(9, N = 60) = 45.190, P < 0.001, \eta^2 = 0.766$ | 0.5 $\mu$ M erastin vs. control: $P = 0.010$<br>0.5 $\mu$ M erastin + fucoidan vs. 0.5 $\mu$ M erastin:<br>0.1-5 $\mu$ g/ml: $P = 1.000$                                                           |
| FV2 | $Z = 0.135, P = 0.008$  | $F(9,50) = 2.879, P = 0.008$ | $[\chi^2]2(9, N = 60) = 44.990, P < 0.001, \eta^2 = 0.763$ | 0.5 $\mu$ M erastin vs. control: $P = 0.010$<br>0.5 $\mu$ M erastin + fucoidan vs. 0.5 $\mu$ M erastin:<br>0.1-5 $\mu$ g/ml: $P = 1.000$                                                           |
| FV3 | $Z = 0.183, P < 0.001$  | $F(9,50) = 3.958, P = 0.001$ | $[\chi^2]2(9, N = 60) = 46.217, P < 0.001, \eta^2 = 0.783$ | 0.5 $\mu$ M erastin vs. control: $P = 0.010$<br>0.5 $\mu$ M erastin + fucoidan vs. 0.5 $\mu$ M erastin:<br>0.1-5 $\mu$ g/ml: $P = 1.000$                                                           |
| FS  | $Z = 0.161, P = 0.001$  | $F(9,50) = 1.698,$           | $[\chi^2]2(9, N = 60) = 43.851, P < 0.001,$                | 0.5 $\mu$ M erastin vs. control: $P = 0.010$                                                                                                                                                       |

|               |                        |                                    |                                                                 |                                                                                                                                                                                                                                           |
|---------------|------------------------|------------------------------------|-----------------------------------------------------------------|-------------------------------------------------------------------------------------------------------------------------------------------------------------------------------------------------------------------------------------------|
|               |                        | $P = 0.114$                        | $\eta^2 = 0.743$                                                | 0.5 $\mu\text{M}$ erastin + fucoidan vs. 0.5 $\mu\text{M}$ erastin:<br>0.1-5 $\mu\text{g/ml}$ : $P = 1.000$                                                                                                                               |
| FE            | $Z = 0.186, P < 0.001$ | $F(9,50) = 2.444,$<br>$P = 0.022$  | $[\chi^2]2(9, N = 60) = 46.595, P < 0.001,$<br>$\eta^2 = 0.790$ | 0.5 $\mu\text{M}$ erastin vs. control: $P = 0.010$<br>0.5 $\mu\text{M}$ erastin + fucoidan vs. 0.5 $\mu\text{M}$ erastin:<br>0.1-0.5 $\mu\text{g/ml}$ : $P = 0.112$ , 1 $\mu\text{g/ml}$ : $P = 0.065$ , 5 $\mu\text{g/ml}$ : $P = 0.423$ |
| Fuc1          | $Z = 0.200, P < 0.001$ | $F(9,50) = 2.877,$<br>$P = 0.008$  | $[\chi^2]2(9, N = 60) = 48.351, P < 0.001,$<br>$\eta^2 = 0.820$ | 0.5 $\mu\text{M}$ erastin vs. control: $P = 0.010$<br>0.5 $\mu\text{M}$ erastin + fucoidan vs. 0.5 $\mu\text{M}$ erastin:<br>0.1-0.5 $\mu\text{g/ml}$ : $P = 0.847$ , 1 $\mu\text{g/ml}$ : $P = 0.328$ , 5 $\mu\text{g/ml}$ : $P = 0.149$ |
| Ferrostatin-1 | $Z = 0.212, P = 0.019$ | $F(3,16) = 20.026,$<br>$P < 0.001$ | $[\chi^2]2(3, N = 20) = 13.489, P = 0.004,$<br>$\eta^2 = 0.710$ | 0.5 $\mu\text{M}$ erastin vs. control: $P = 0.011$<br>0.5 $\mu\text{M}$ erastin + ferrostatin-1 vs. 0.5 $\mu\text{M}$ erastin: $P = 0.011$                                                                                                |
